# Supplementary material
Source: PubMed Central journal article supplement (PMC6137535)
Supplement: jamapediatr-172-e180315-s001.pdf [file jamapediatr-172-e180315-s001.pdf]

## Supplementary Online Content

Mitre E, Susi A, Kropp LE, Schwartz DJ, Gorman GH, Nylund CM. Association between use of acid-suppressive medications or antibiotics during infancy and allergic diseases in early childhood. *JAMA Pediatr*. Published online April 2, 2018. doi:10.1001/jamapediatrics.2018.0315

**eTable 1.** American Hospital Formulary System Codes Used in Study

**eTable 2.** *International Classification of Diseases, 9th revision, Clinical Modification* Diagnostic Codes Used in Study

**eTable 3.** Adjusted Hazard Ratios for Allergic Diseases by Gender, Cesarean Section, and Prematurity in Children

**eTable 4.** Incidence Densities (in Cases per 10,000 Person-Years) of Food and Non-Food Allergic Diseases In Children Diagnosed With GERD During Infancy and Given Antibiotics, H2RAs, or PPIs Prior to 6 Months of Age

**eTable 5.** Adjusted Hazard Ratios for Food and Non-Food Allergic Diseases in Children Diagnosed With GERD During Infancy and Given Antibiotics, H2RAs, or PPIs Prior to 6 Months of Age

This supplementary material has been provided by the authors to give readers additional information about their work.

## **eTable1. American Hospital Formulary System Codes Used in Study**

### Antibiotics

08.12.06 cephalosporins

08.12.12 macrolides

08.12.16 penicillins

08.12.18 quinolones

08.12.20 sulfonamides

08.12.24 tetracyclines

08.12.28 miscellaneous antibiotics (including clindamycin)

08.14.08 azoles

(additionally, specific searches performed in the drug name field for linezolid, colistmethate sodium, and metronidazole)

Proton pump inhibitors: 56.28.36 (omeprazole, lansoprazole, esomeprazole, pantoprazole, dexlansoprazole, and rabeprazole)

H2 Receptor antagonists: 56.28.12 (cimetidine, famotidine, nizatidine, and ranitidine)

**eTable2. *International Classification of Diseases, 9th revision, Clinical Modification*  
Diagnostic Codes Used in Study**

|                         |                                                                                                                                |
|-------------------------|--------------------------------------------------------------------------------------------------------------------------------|
| Peanut allergy          | V1501                                                                                                                          |
| Milk allergy            | V1502                                                                                                                          |
| Egg allergy             | V1503                                                                                                                          |
| Seafood allergy         | V1504                                                                                                                          |
| Other food allergy      | V1505, 9957                                                                                                                    |
| Anaphylaxis             | 9956, 99560, 99561, 99562, 99563, 99564, 99565, 99566, 99567, 99568, 99569, 9950                                               |
| Asthma                  | 4930, 49300, 49301, 49302, 4931, 49310, 49311, 49312, 4932, 49320, 49321, 49322, 4938, 49381, 49382, 4939, 49390, 49391, 49392 |
| Atopic Dermatitis       | 6918, 6920, 6921, 6922, 6923, 6925, 6926, 6928, 69281, 69283,                                                                  |
| Allergic Rhinitis       | 477, 4770, 4772, 4778, 4779                                                                                                    |
| Allergic Conjunctivitis | 37205, 37214                                                                                                                   |
| Urticaria               | 708, 7080, 7081, 7082, 7083, 7084, 7085, 7088, 7089                                                                            |
| Other Allergy           | V1507, V1509, 9994, 99941, 99949, 99527, 9953                                                                                  |
| Contact Dermatitis      | 6924, 69284, 69289, 6929, 6930, 6931, 6938, 6939,                                                                              |
| Medication Allergy      | V140, V141, V142, V143, V144, V145, V146, V147, V148, V149                                                                     |
| Prematurity             | 76521, 76522, 76523, 76524, 76525, 76526, 76527, 76528                                                                         |
| Cesarean section        | V3001, V3101, V3201, V3301, V3401, V3501, V3601, V3701, V3901, 7634                                                            |

**eTable3. Adjusted Hazard Ratios for Allergic Diseases by Gender, Cesarean Section, and Prematurity in Children. Ratios were adjusted for gender, prematurity, birth by Cesarean section, and effect of the other medication classes.**

|                            | Male vs Female<br>Adjusted Hazard<br>Ratio (95% CI) | Cesarean Section<br>Adjusted Hazard<br>Ratio (95% CI) | Prematurity<br>Adjusted Hazard<br>Ratio (95% CI) |
|----------------------------|-----------------------------------------------------|-------------------------------------------------------|--------------------------------------------------|
| Any Food<br>Allergy        | 1.13<br>(1.11-1.18)                                 | 1.07<br>(1.05-1.11)                                   | 1.04<br>(0.98-1.11)                              |
| Cow's Milk<br>Allergy      | 1.24<br>(1.14-1.29)                                 | 1.1<br>(1.04-1.19)                                    | 1.12<br>(0.98-1.29)                              |
| Peanut<br>Allergy          | 1.28<br>(1.22-1.35)                                 | 1.06<br>(1.004-1.13)                                  | 1.02<br>(0.89-1.16)                              |
| Egg Allergy                | 1.18<br>(1.08-1.28)                                 | 1.27<br>(1.14-1.40)                                   | 1.25<br>(1.004-1.55)                             |
| Seafood<br>Allergy         | 1.20<br>(1.07-1.28)                                 | 1.20<br>(1.05-1.36)                                   | 1.18<br>(0.89-1.55)                              |
| Other Food<br>Allergy      | 1.13<br>(1.09-1.16)                                 | 1.06<br>(1.02-1.09)                                   | 1.05<br>(0.97-1.13)                              |
| Anaphylaxis                | 1.31<br>(1.24-1.38)                                 | 1.06<br>(1.001-1.13)                                  | 1.03<br>(0.90-1.18)                              |
| Asthma                     | 1.55<br>(1.53-1.58)                                 | 1.10<br>(1.09-1.12)                                   | 1.44<br>(1.39-1.50)                              |
| Atopic<br>Dermatitis       | 1.10<br>(1.08-1.12)                                 | 1.06<br>(1.04-1.07)                                   | 0.98<br>(0.95-1.01)                              |
| Allergic<br>Rhinitis       | 1.12<br>(1.11-1.13)                                 | 1.11<br>(1.10-1.13)                                   | 1.06<br>(1.03-1.09)                              |
| Allergic<br>Conjunctivitis | 1.24<br>(1.21-1.27)                                 | 1.09<br>(1.06-1.12)                                   | 1.09<br>(1.02-1.16)                              |
| Urticaria                  | 1.03<br>(1.01-1.04)                                 | 1.03<br>(1.01-1.05)                                   | 0.98<br>(0.94-1.01)                              |
| Other Allergy              | 1.11<br>(1.10-1.13)                                 | 1.07<br>(1.05-1.09)                                   | 0.98<br>(0.93-1.03)                              |
| Contact<br>Dermatitis      | 1.07<br>(1.06-1.08)                                 | 1.03<br>(1.02-1.04)                                   | 1.01<br>(0.98-1.03)                              |
| Medication<br>Allergy      | 1.17<br>(1.11-1.23)                                 | 1.10<br>(1.06-1.14)                                   | 1.10<br>(1.02-1.20)                              |

**eTable 4. Incidence Densities (in Cases per 10,000 Person-Years) of Food and Non-Food Allergic Diseases In Children Diagnosed With GERD During Infancy and Given Antibiotics, H2RAs, or PPIs Prior to 6 Months of Age.**

|                      | <i>No Drug Exposure<br/>(n=33,634)</i> | <i>Antibiotics<br/>(n=22,626)</i> | <i>H2RA<br/>(n=49,681)</i> | <i>PPI<br/>(n=12,128)</i> |
|----------------------|----------------------------------------|-----------------------------------|----------------------------|---------------------------|
| Any Food Allergy     | 73.8                                   | 101.3                             | 118.8                      | 153.0                     |
| Any Non-Food Allergy | 2424.9                                 | 3322.5                            | 2834.7                     | 3006.3                    |

**eTable 5. Adjusted Hazard Ratios for Food and Non-Food Allergic Diseases in Children Diagnosed With GERD During Infancy and Given Antibiotics, H2RAs, or PPIs Prior to 6 Months of Age.**

|                      | <i>Antibiotics<br/>Adjusted Hazard<br/>Ratio<br/>(95% CI)</i> | <i>H2RA Adjusted<br/>Hazard Ratio<br/>(95% CI)</i> | <i>PPI Adjusted<br/>Hazard Ratio<br/>(95% CI)</i> |
|----------------------|---------------------------------------------------------------|----------------------------------------------------|---------------------------------------------------|
| Any Food Allergy     | 1.02 (0.95-1.09)                                              | 1.50 (1.38-1.64)                                   | 1.93 (1.73-2.16)                                  |
| Any Non-Food Allergy | 1.44 (1.39-1.49)                                              | 1.07 (1.03-1.10)                                   | 1.16 (1.10-1.21)                                  |
